# Supplementary material for: Improved Long-Term Preservation of Cannabis Inflorescence by Utilizing Integrated Pre-Harvest Hexanoic Acid Treatment and Optimal Post-Harvest Storage Conditions
Source: MDPI journal article supplement (doi:10.3390/plants13070992), 2024-03-30
Supplement: s1 [file s1]

**Table S1.** Comparison between the compounds concentrations determined at harvest day ( $t_0$ ) and at the end of the drying/curing phase (d6) within each of the treatment groups, namely REF (reference group) and Hex8mM (8mM hexanoic acid treatment group)<sup>a</sup>. Only compounds exhibiting significant differences are listed in the table.

|                            | REF Concentration<br>± SE at $t_0$ | REF Concentration ± SE at<br>d6 after drying and curing | Hex8mM<br>Concentration ± SE<br>at $t_0$ | Hex8mM Concentration ±<br>SE at d6 after drying and<br>curing |
|----------------------------|------------------------------------|---------------------------------------------------------|------------------------------------------|---------------------------------------------------------------|
| THC                        | 0.17 ± 0.04                        | 0.25 ± 0.04 (**) <sup>a</sup>                           | 0.22 ± 0.03                              | 0.28 ± 0.08 (ns) <sup>b</sup>                                 |
| CBG                        | 0.10 ± 0.03                        | 0.09 ± 0.02 (ns)                                        | 0.124 ± 0.004                            | 0.09 ± 0.01 (*)                                               |
| (-)- $\beta$ -pinene       | 0.186 ± 0.008                      | 0.158 ± 0.003 (**)                                      | 0.18 ± 0.02                              | 0.18 ± 0.01 (ns)                                              |
| $\beta$ -myrcene           | 0.054 ± 0.003                      | 0.028 ± 0.001 (****)                                    | 0.050 ± 0.0027                           | 0.035 ± 0.002 (****)                                          |
| d-limonene                 | 0.67 ± 0.02                        | 0.428 ± 0.002 (****)                                    | 0.61 ± 0.02                              | 0.48 ± 0.06 (****)                                            |
| Linalool                   | 0.111 ± 0.008                      | 0.074 ± 0.003 (****)                                    | 0.10 ± 0.01                              | 0.086 ± 0.005 (ns)                                            |
| Fenchol                    | 0.070 ± 0.004                      | 0.057 ± 0.002 (*)                                       | 0.063 ± 0.008                            | 0.067 ± 0.006 (ns)                                            |
| Pinalol                    | 0.076 ± 0.004                      | 0.067 ± 0.002 (*)                                       | 0.069 ± 0.008                            | 0.075 ± 0.005 (ns)                                            |
| $\alpha$ -terpineol        | 0.077 ± 0.005                      | 0.064 ± 0.006 (*)                                       | 0.074 ± 0.009                            | 0.080 ± 0.006 (ns)                                            |
| $\beta$ -<br>caryophyllene | 0.47 ± 0.03                        | 0.394 ± 0.006 (**)                                      | 0.39 ± 0.04                              | 0.43 ± 0.03 (ns)                                              |
| $\alpha$ -humulene         | 0.18 ± 0.02                        | 0.149 ± 0.004 (*)                                       | 0.15 ± 0.02                              | 0.16 ± 0.02 (ns)                                              |
| (-)- $\alpha$ -bisabolol   | 0.061 ± 0.003                      | 0.053 ± 0.002 (*)                                       | 0.053 ± 0.005                            | 0.059 ± 0.004 (ns)                                            |
| $\gamma$ -elemene          | 0.12 ± 0.02                        | 0.095 ± 0.001 (*)                                       | 0.089 ± 0.006                            | 0.10 ± 0.02 (ns)                                              |
| $\beta$ -eudesmene         | 0.07 ± 0.01                        | 0.053 ± 0.002 (*)                                       | 0.054 ± 0.006                            | 0.057 ± 0.009 (ns)                                            |
| $\alpha$ -selinene         | 0.07 ± 0.01                        | 0.055 ± 0.002 (*)                                       | 0.056 ± 0.007                            | 0.060 ± 0.009 (ns)                                            |

<sup>a</sup> Two-way ANOVA followed by Dunnet's posthoc at an adjusted significance value of  $p < 0.05$ :  $p$  value  $< 0.0332$  (\*),  $p < 0.0021$  (\*\*),  $p < 0.0002$  (\*\*\*),  $p < 0.0001$  (\*\*\*\*).

<sup>b</sup> ns, not significant.

**Table S2.** Comparison between THCA, CBGA and CBDA concentrations as a function of hexanoic acid concentration (i.e. 0 mM, 1 mM, 4 mM, 8 mM and 10 mM) at the end of the drying/curing phase (day 6) in order to determine the optimal concentration for spray application of hexanoic acid. Statistical significance for each compound was calculated using two-way ANOVA followed by Tukey's posthoc test at  $\alpha = 0.05$ . Letters in each row in the table are used to present the statistical test results for each compound.

|      | REF             | Hex1mM          | Hex4mM          | Hex8mM          | Hex10mM         |
|------|-----------------|-----------------|-----------------|-----------------|-----------------|
| THCA | 15.1 ± 0.6 a    | 14.6 ± 0.5 a    | 13.2 ± 0.6 b    | 16.6 ± 1.3 c    | 14.6 ± 2.0 a    |
| CBGA | 0.64 ± 0.03 a   | 0.44 ± 0.02 a   | 0.58 ± 0.02 a   | 0.73 ± 0.06 a   | 0.30 ± 0.04 a   |
| CBDA | 0.039 ± 0.003 a | 0.052 ± 0.008 a | 0.054 ± 0.005 a | 0.042 ± 0.003 a | 0.057 ± 0.006 a |

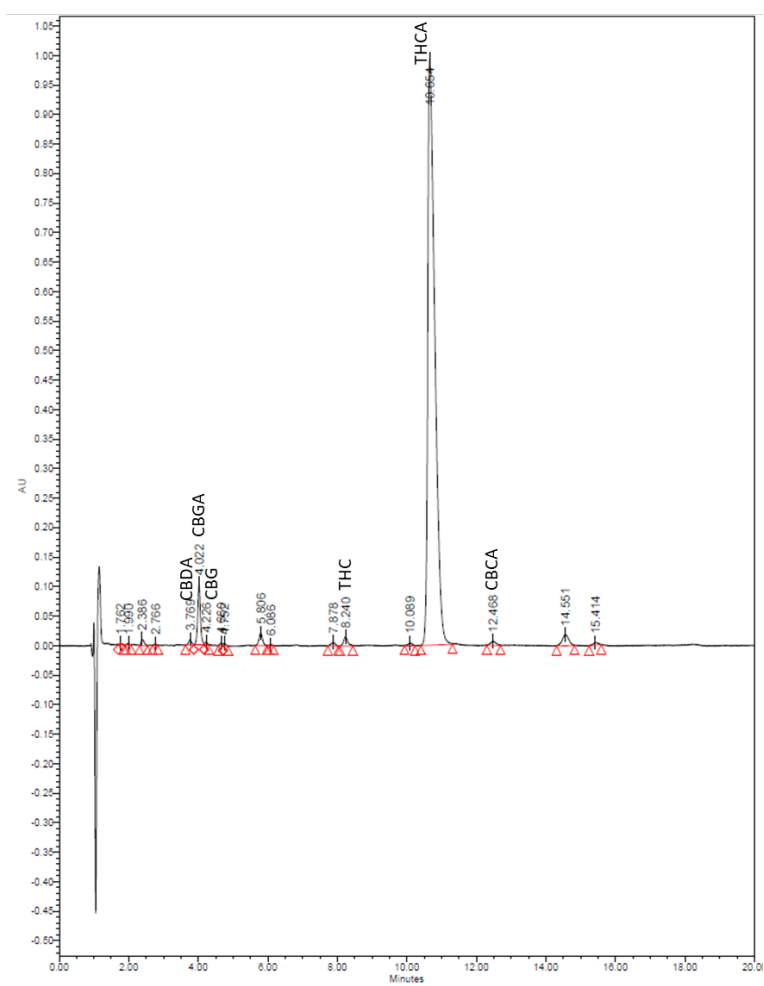

**Figure S1.** Representative HPLC-PDA chromatogram of the 505 chemovar ethanol extract.

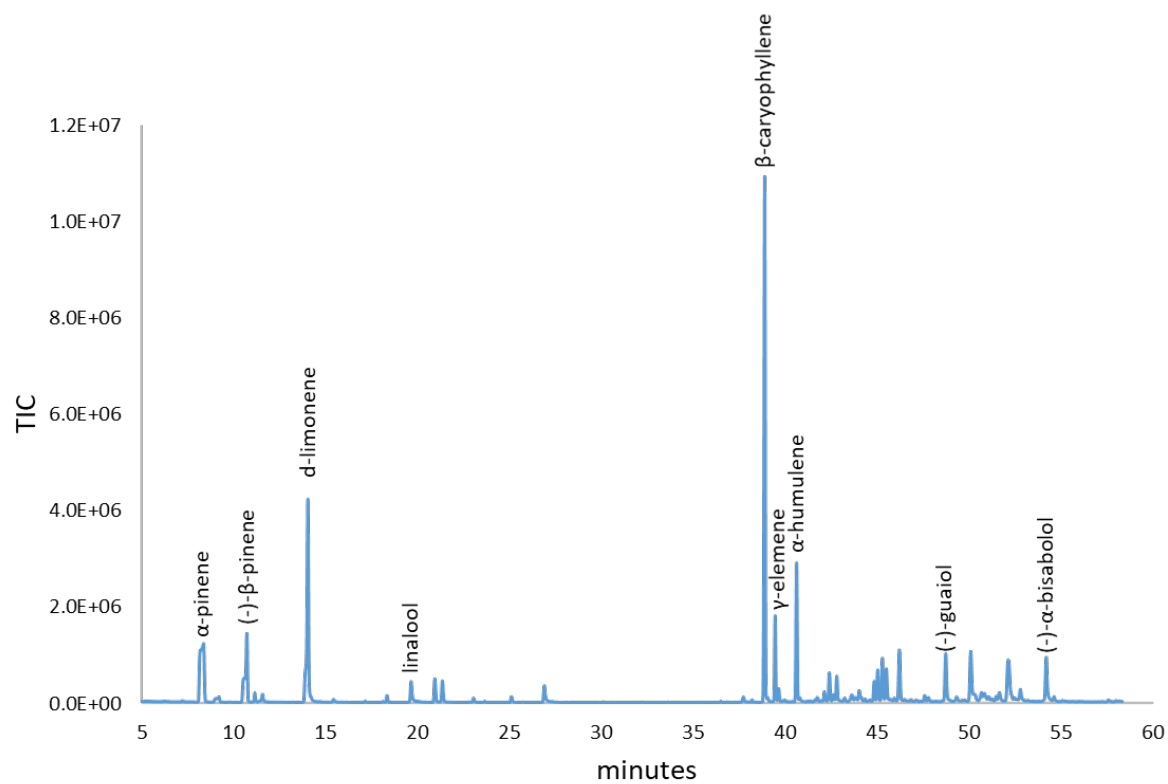

**Figure S2.** Representative GC/MS chromatogram of the 505 chemovar ethanolic extract.
